# Supplementary material for: Paramecium-like α-MnO2hierarchical hollow structures with enhanced electrochemical capacitance prepared by a facile dopamine carbon-source assisted shell-swelling etching method
Source: Royal Society of Chemistry journal article supplement (doi:10.1039/c4ta04312j), 2014-10-17
Supplement: c4ta04312j1.pdf [file c4ta04312j1.pdf]

Electronic Supplementary Material (ESI) for Journal of Materials Chemistry A.  
This journal is © The Royal Society of Chemistry 2014

Supporting Information

**Paramecium-shaped  $\alpha$ -MnO<sub>2</sub> hierarchical hollow structures  
with enhanced electrochemical capacitance prepared by a  
facile dopamine carbon-source assisted shell-swelling  
etching method**

**Zhiwei Wen, Wen She, Yuesheng Li and Renchao Che\***

*Department of Materials Science and Laboratory of Advanced Materials,  
Fudan University,  
Shanghai, P. R. China.  
Fax: +86 21 5163 0210; Tel: +86 21 5163 0213;  
E-mail: [rcche@fudan.edu.cn](mailto:rcche@fudan.edu.cn)*

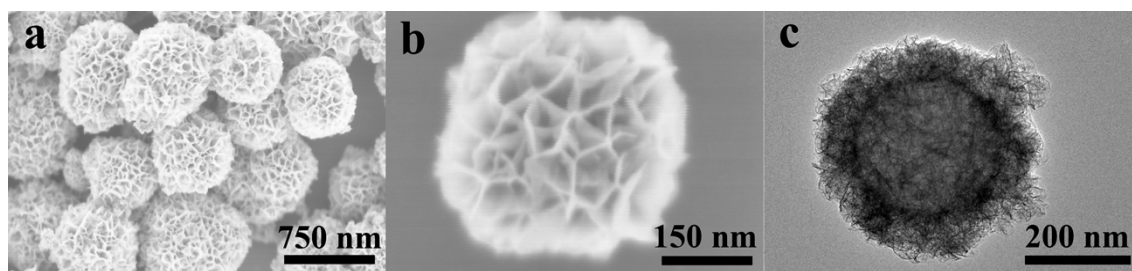

**Fig. S1** FESEM and TEM images of MnO<sub>2</sub> hollow spheres for comparable sample

Typically, carbon spheres were synthesized by hydrothermal method using glucose as the carbon source. Carbon@MnO<sub>2</sub> core-shell structures were then prepared by the reaction between carbon spheres and KMnO<sub>4</sub> after homogeneously mixing and hydrothermal treatment. MnO<sub>2</sub> hollow spheres were collected after calcination of the core-shell structures in a tubular furnace. The MnO<sub>2</sub> hollow spheres are with external diameter ~ 420 nm and inner diameter ~ 280 nm.

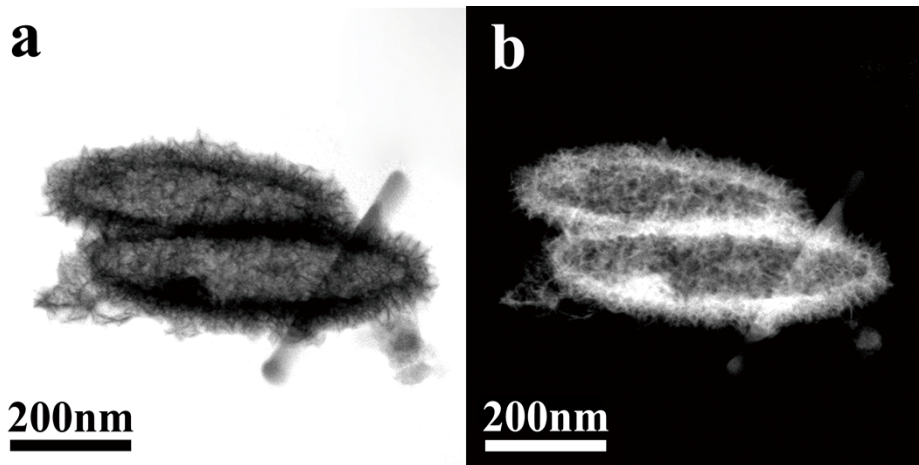

**Fig. S2** STEM-BF and STEM-HAADF images of P-MnO<sub>2</sub> sample

STEM-BF and STEM-HAADF tests were carried out to further confirm the unique structure of P-MnO<sub>2</sub>. Dark areas represent atomic regions in STEM-BF image, while bright areas represent atomic regions in STEM-HAADF image. Both STEM images clearly indicate the presence of the hollow structure. Besides, flaky sheets of shell can also be confirmed by these two images.

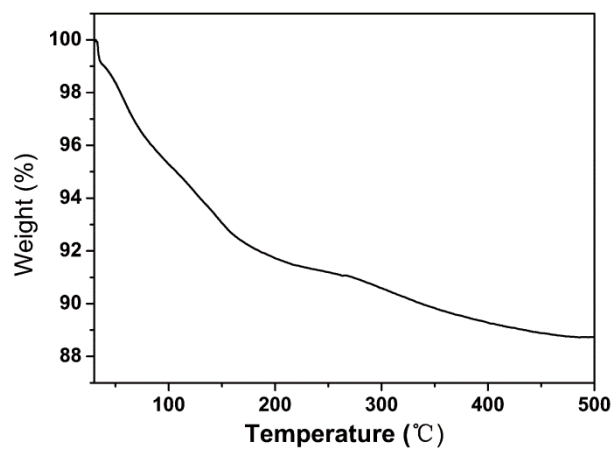

**Fig. S3** TGA curve of final product of Paramecium-like MnO<sub>2</sub> hierarchical hollow structure  
The TGA curve has shown that the residual quantity of carbon of the final product is about 11%.

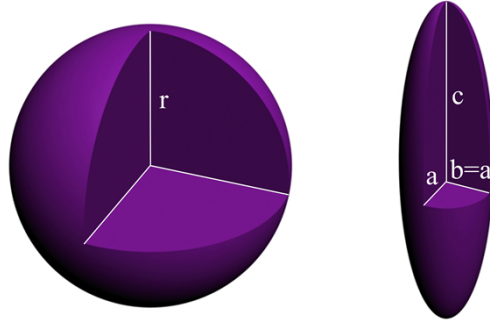

**Fig. S4** Space utilization models of S-MnO<sub>2</sub> and P-MnO<sub>2</sub>, respectively

As is shown in Figure 3S, the volumes of sphere and ellipsoid are calculated as the formulae  $V_{sp} = \frac{4}{3}\pi r^3$  and  $V_{el} = \frac{4}{3}\pi a^2 c$ , respectively. While the surface areas of those are obtained by formulae  $S_{sp} = 4\pi r^2$  and

$S_{el} = 2\pi a^2 \left(1 + \frac{c}{ae} \sin^{-1} e\right)$  (where  $e = \sqrt{1 - \frac{a^2}{c^2}}$  ( $c > a$ )). The latter could be substituted by an

approximate formula  $S_{el} \approx 4\pi^{1.6} \sqrt{\frac{a^{3.2} + 2a^{1.6}c^{1.6}}{3}}$ . The ellipsoid has an advantage in space utilization with

the larger surface than that of sphere in the case of same volume. We assume  $c = n \cdot a$  ( $n > 1$ ) in ellipsoid (defined as prolate spheroid), when  $V_{el} = \frac{4}{3}\pi n a^3 = V_{sp} = \frac{4}{3}\pi r^3$ , then  $r$  gets  $\sqrt[3]{n} \cdot a$ , and the ratio

$q = \frac{V_{el}}{V_{sp}} = \frac{1}{\sqrt[3]{n^2}} \times \sqrt[1.6]{\frac{1 + 2n^{1.6}}{3}}$ . The larger  $n$  gets, the larger  $q$  will be, and the larger surface ellipsoid will

obtain. In other word, materials with large aspect ratio will get higher space utilization. According to calculating results, the space utilization of P-MnO<sub>2</sub> is nearly three times high as that of S-MnO<sub>2</sub>, which is supposed to enhance electrochemical properties.
